# Supplementary material
Source: Research Square preprint supplement (doi:10.21203/rs.3.rs-9101659/v1)
Supplement: Supplementary file 1 [file 723e89414b5b6c59188abaac.xlsx]

## Sheet: axial mean velocity
r/R	x/R=0.5		x/R=1.0		x/R=1.5		x/R=2.0
	particle	gas	particle	gas	particle	gas	particle	gas
0	-0.9	-0.91	-0.7	-0.67	0.6	0.61	0.5	0.51
0.1	-0.7	-0.72	-0.5	-0.52	0.3	0.31	0.45	0.45
0.2	-0.3	-0.28	-0.1	-0.11	0.1	0.11	0.39	0.37
0.3	-0.1	-0.11	0.1	0.11	-0.1	-0.11	0.32	0.3
0.4	0.5	0.47	0.2	0.2	-0.1	-0.11	0.24	0.22
0.5	0.7	0.67	0.4	0.4	-0.2	-0.2	0.1	0.11
0.6	0.6	0.61	0.5	0.51	-0.3	-0.3	-0.1	-0.12
0.7	0.4	0.43	0.7	0.71	0.2	0.21	-0.12	-0.12
0.8	0.3	0.31	0.8	0.78	0.4	0.39	-0.24	-0.24
0.9	0.2	0.21	0.7	0.77	0.5	0.48	-0.31	-0.3
1	0.1	0.08	0.8	0.81	0.7	0.67	-0.38	-0.36

## Sheet: tangential mean velocity
r/R	x/R=0.5	x/R=1.0	x/R=1.5	x/R=2.0
	gas	gas	gas	gas
0	-0.51	-0.27	0.86	-0.24
0.1	-0.41	-0.12	0.75	-0.14
0.2	-0.11	0.32	0.63	-0.21
0.3	-0.01	0.45	0.55	0.01
0.4	0.24	0.68	0.51	0.09
0.5	0.42	0.85	0.25	0.12
0.6	0.52	0.75	0.11	0.09
0.7	0.56	0.65	-0.12	0.11
0.8	0.31	0.42	-0.26	0.21
0.9	0.11	0.21	-0.44	0.25
1	-0.03	0.15	-0.65	0.27

## Sheet: RMS of axial fluctuating veloci
r/R	x/R=0.5		x/R=1.0		x/R=1.5		x/R=2.0
	particle	gas	particle	gas	particle	gas	particle	gas
0	0.54	0.51	0.51	0.58	0.52	0.51	0.42	0.44
0.1	0.41	0.43	0.53	0.57	0.52	0.54	0.35	0.35
0.2	0.23	0.21	0.61	0.65	0.49	0.44	0.42	0.45
0.3	0.34	0.37	0.62	0.69	0.49	0.45	0.46	0.49
0.4	0.64	0.69	0.54	0.58	0.52	0.54	0.54	0.54
0.5	0.84	0.88	0.56	0.51	0.57	0.57	0.46	0.42
0.6	0.91	0.9	0.61	0.69	0.61	0.61	0.32	0.32
0.7	0.78	0.71	0.49	0.41	0.58	0.55	0.31	0.35
0.8	0.65	0.61	0.52	0.59	0.55	0.52	0.24	0.24
0.9	0.34	0.39	0.55	0.51	0.53	0.53	0.18	0.22
1	0.32	0.38	0.51	0.59	0.52	0.59	0.11	0.11

## Sheet: RMS of tangential fluctuating v
r/R	x/R=0.5	x/R=1.0	x/R=1.5	x/R=2.0
	gas	gas	gas	gas
0	0.35	0.42	0.42	0.33
0.1	0.42	0.44	0.42	0.29
0.2	0.35	0.46	0.39	0.37
0.3	0.54	0.55	0.44	0.34
0.4	0.62	0.63	0.45	0.31
0.5	0.54	0.57	0.51	0.29
0.6	0.62	0.66	0.51	0.27
0.7	0.55	0.55	0.56	0.19
0.8	0.54	0.53	0.49	0.15
0.9	0.49	0.55	0.32	0.09
1	0.55	0.56	0.35	0.11

## Sheet: O₂ volume fraction
r/R	x/R=0.5	x/R=1.0	x/R=1.5	x/R=2.0
	gas	gas	gas	gas
0	6	7.3	9.8	10.4
0.1	6.4	7.6	8.7	10.6
0.2	7	7.8	8.8	9.8
0.3	7.6	8.2	9.8	10.5
0.4	8	8.9	9.9	10.8
0.5	9	9.5	11.1	12.4
0.6	10	11	12.3	13.2
0.7	11	11.9	12.9	13.4
0.8	12.5	13.4	13.6	14.4
0.9	14	14.9	15.4	16.1
1	14.5	15.4	15.7	16.7

## Sheet: CO₂ volume fraction
r/R	x/R=0.5	x/R=1.0	x/R=1.5	x/R=2.0
	gas	gas	gas	gas
0	13.3	14.3	12.1	10.1
0.1	12.6	13.2	12.2	9.4
0.2	12.5	12.2	12.5	10.3
0.3	13.1	12.6	12.8	10.1
0.4	11.5	11.1	11.5	9.3
0.5	10.7	11.1	10.6	8.4
0.6	10.1	10.3	9.2	7.9
0.7	9.9	9.4	9.1	7.7
0.8	9.7	9.3	9.3	7.5
0.9	8.7	8.5	8.4	7.1
1	7.7	7.2	7.4	6.8

## Sheet: CO volume fraction
r/R	x/R=0.5	x/R=1.0	x/R=1.5	x/R=2.0
	gas	gas	gas	gas
0	0.43	0.54	0.32	0.24
0.1	0.49	0.57	0.31	0.29
0.2	0.51	0.55	0.35	0.22
0.3	0.51	0.58	0.36	0.21
0.4	0.42	0.43	0.29	0.18
0.5	0.38	0.41	0.26	0.15
0.6	0.34	0.37	0.25	0.12
0.7	0.33	0.32	0.19	0.11
0.8	0.25	0.26	0.15	0.13
0.9	0.25	0.28	0.13	0.13
1	0.26	0.24	0.14	0.11

## Sheet: NO volume fraction
r/R	x/R=0.5	x/R=1.0	x/R=1.5	x/R=2.0
	gas	gas	gas	gas
0	250	260	220	180
0.1	265	278	231	188
0.2	266	285	233	193
0.3	276	271	221	199
0.4	251	253	232	211
0.5	233	231	211	183
0.6	201	209	193	173
0.7	194	204	174	163
0.8	182	193	164	158
0.9	174	184	155	149
1	162	176	154	151

## Sheet: Gas-phase temperature
r/R	x/R=0.5	x/R=1.0	x/R=1.5	x/R=2.0
	gas	gas	gas	gas
0	1100	1124	1030	983
0.1	1143	1135	976	954
0.2	1132	1124	965	965
0.3	1124	1132	943	932
0.4	1000	1076	922	898
0.5	984	998	911	876
0.6	854	876	867	854
0.7	823	843	843	834
0.8	811	832	812	786
0.9	786	812	745	745
1	758	772	732	732
